# Supplementary material for: Transplantation of human autologous synovial mesenchymal stem cells with trisomy 7 into the knee joint and 5 years of follow‐up
Source: PubMed Central journal article supplement — Stem Cells Transl Med. 2021 Aug 3;10(11):1530–43. doi: 10.1002/sctm.20-0491 (PMC8550709; doi:10.1002/sctm.20-0491), 2021-08-03
Supplement: SCT3-10-1530-s001.pdf [file SCT3-10-1530-s001.pdf]

Figure S1.

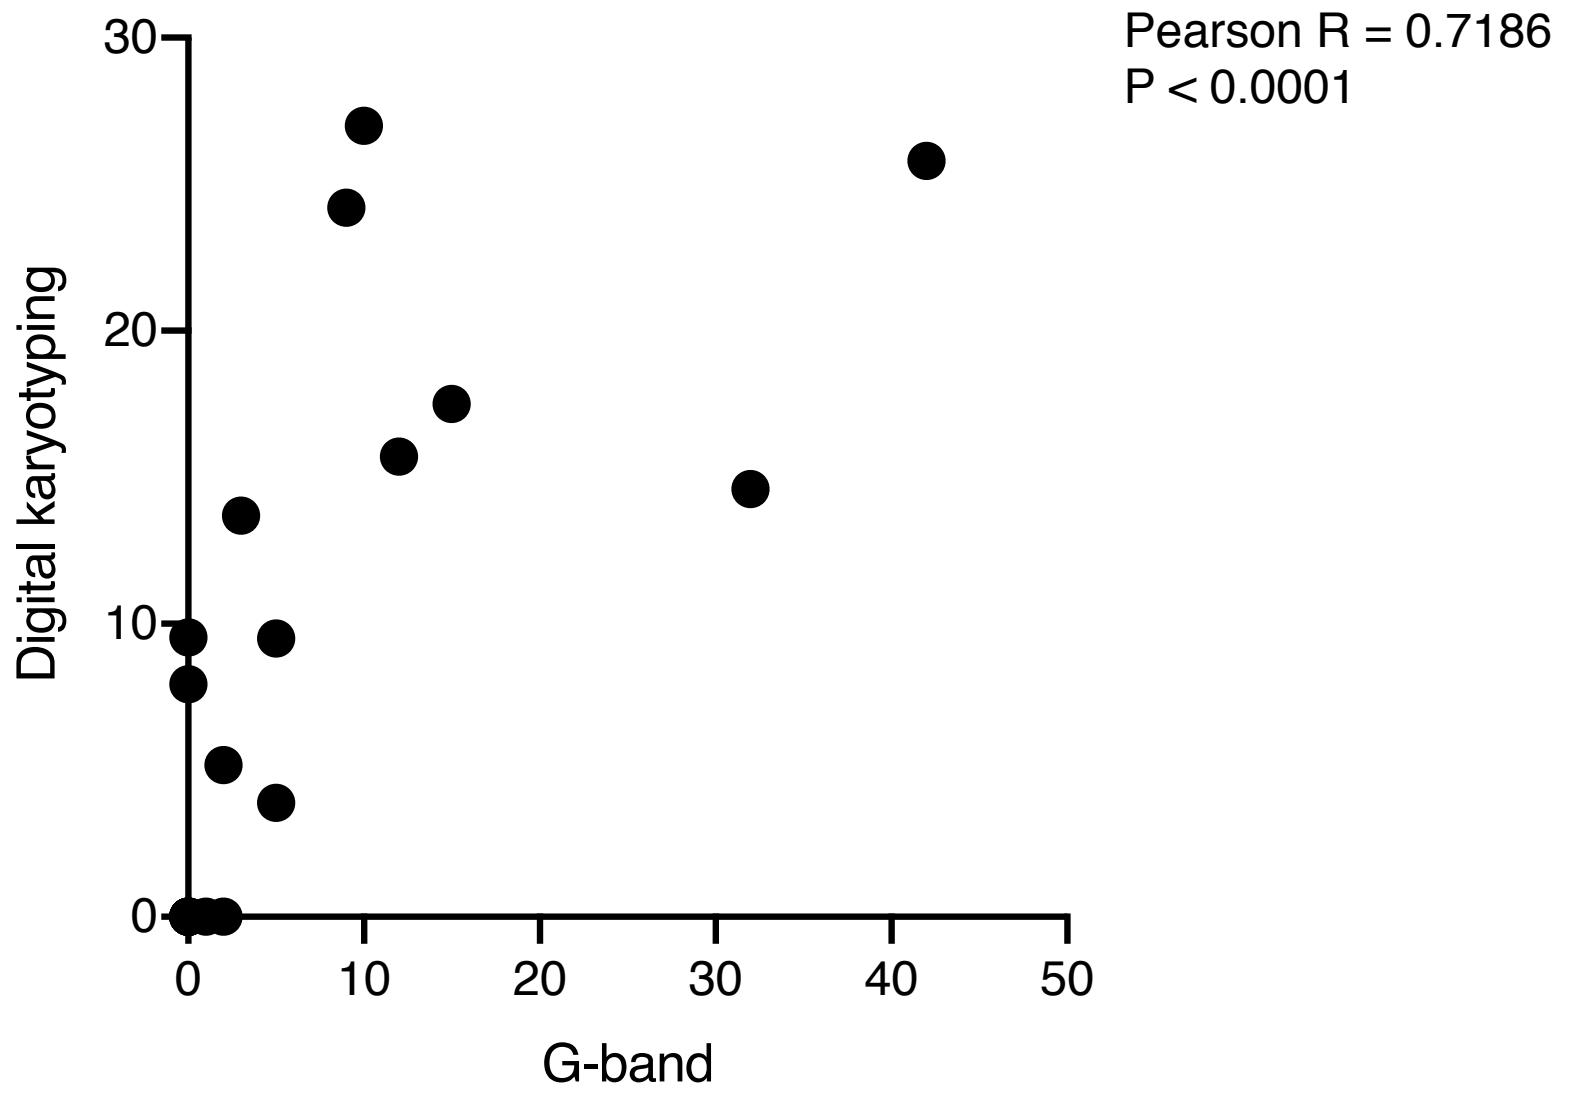

Figure S2.

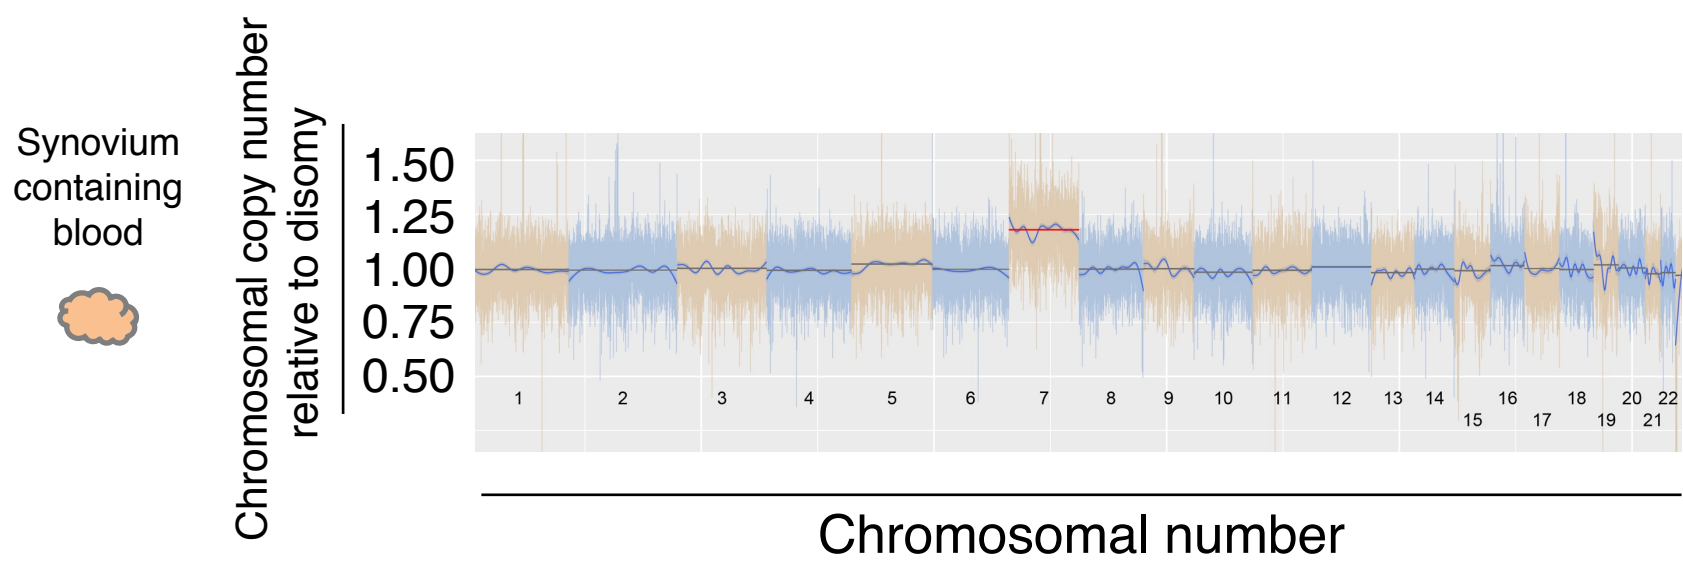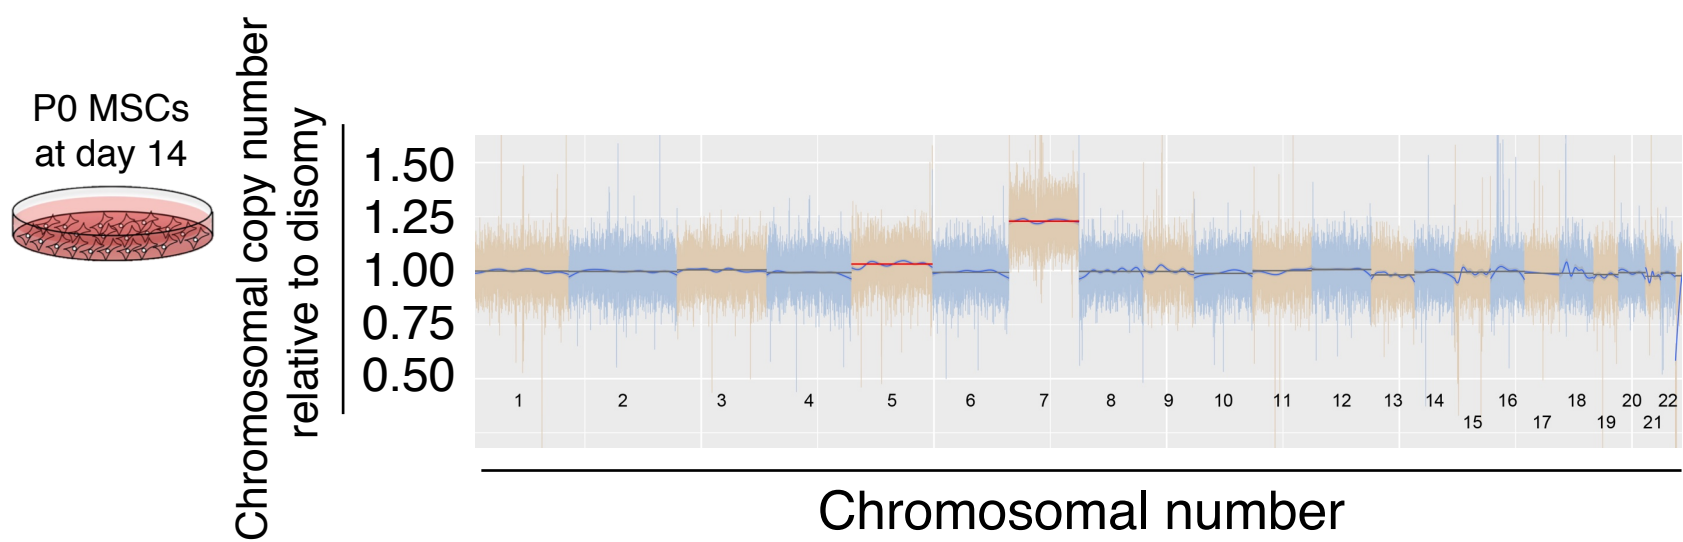

Table S1.

**Karyotype abnormalities by G-banding.**

| ID | P0: 20~50 cells                             | P2 : 100 cells                                                              | P5 : 100 cells                                                                              | P10: 100 cells                                             | P15 : 100 cells                                              |
|----|---------------------------------------------|-----------------------------------------------------------------------------|---------------------------------------------------------------------------------------------|------------------------------------------------------------|--------------------------------------------------------------|
| 01 | +7 [1], +7 +7 [1],<br>+7 +Y +16 [1], + Y[1] | +7 [2]                                                                      | NA                                                                                          | +7 [5], -Y [2]<br>+10 [21]                                 | +10 [75]<br>-Y [11]                                          |
| 02 | +3 [1/50],<br>+5, +7, -21, -22 [1/50]       | inv (X) (p11. 2q28) [1],<br>1, X t(q11.2;p34.3) [1]                         | +7 [2], +5, +7, +8 [1],<br>+13 [1],<br>7, 20 t(q22;q13.3)                                   | 3, 4t(p21;p16) [1/100]                                     | Normal                                                       |
| 03 | Normal                                      | +5 [1], +7 [1],<br>+8 [1], +9, +12 [1]                                      | +7 [2]                                                                                      | +7 [32]                                                    | +7 [1],<br>1, 22 t(p32;q11.2)<br>[1]<br>2, 15 t(q13;q22) [1] |
| 04 | +7 [2/30], +12 [1/30]                       | 1, 16 t (p10;q10) [1],<br>2, 12 t (q31;q24.3) [1],<br>9, 14 t (q13;q22) [1] | Normal                                                                                      | Normal                                                     | 8, 10 t(q22;p11.2)<br>[2]                                    |
| 05 | Normal                                      | +7 [2], +X [1]                                                              | +7 [3],<br>10, 17 t(q22;q25) [3]                                                            | Normal                                                     | Normal                                                       |
| 06 | Normal                                      | +7 [42]                                                                     | +7 [10], +7, +15 [1],<br>3, 6t(q27;p21.1) [1]                                               | +7 [15]                                                    | +7 [9]                                                       |
| 07 | Normal                                      | +7 [5],<br>X, 2 t (p22.1;q31) [1]                                           | 7, 10 t(q31.3; q26.3) [9]                                                                   | Normal                                                     | Normal                                                       |
| 08 | Normal                                      | +7 [12]                                                                     | +7 [20], +7 +7 [2]                                                                          | -X, 11, 14t(q13;q24) [9],<br>+7 [2], +7 +9 [1],<br>+11 [1] | +7 [1], +7 +9 [1],<br>+19 [1]                                |
| 09 | Normal                                      | Normal                                                                      | 11, 11t (p15.3;q21) [2],<br>inv (11) (p15.3;q21),<br>15, 20t (q22; q13.3) [1],<br>+7 +8 [1] | 7, 11t(q36;q22) [1],<br>11, 11t(p15.3;q21) [1]             | Normal                                                       |
| 10 | Normal                                      | Normal                                                                      | Normal                                                                                      | Normal                                                     | Normal                                                       |

Table S2.

**Karyotype abnormalities by digital karyotyping.**

| ID | P0        | P2         | P5         | P10                      | P15        |
|----|-----------|------------|------------|--------------------------|------------|
| 01 | +7 [5.2%] | NA         | +7 [4.8%]  | +7 [9.5%]<br>+10 [33.5%] | +10 [11%]  |
| 02 | ND        | NA         | NA         | ND                       | NA         |
| 03 | ND        | NA         | NA         | +7 [14.6%]               | NA         |
| 04 | ND        | NA         | NA         | ND                       | NA         |
| 05 | ND        | NA         | NA         | ND                       | NA         |
| 06 | +7 [7.9%] | +7 [25.8%] | +7 [27.0%] | +7 [17.5%]               | +7 [24.2%] |
| 07 | ND        | +7 [3.9%]  | NA         | ND                       | NA         |
| 08 | +7 [9.5%] | +7 [15.7%] | NA         | +7 [13.7%]               | +7 [1.5%]  |
| 09 | ND        | NA         | NA         | ND                       | NA         |
| 10 | ND        | NA         | NA         | ND                       | NA         |

Table S3.

Table S3-1. List of 372 genes on chromosome 7.

|           |              |          |                |            |              |
|-----------|--------------|----------|----------------|------------|--------------|
| ABCB8     | NM_007188    | C7orf60  | NM_152556      | RINT1      | NM_021930    |
| ZNF316    | NM_001278559 | RBM28    | NM_018077      | AGK        | NM_018238    |
| ZNF117    | NM_015852    | TWISTNB  | NM_001002926   | CACNA2D1   | NM_001302890 |
| LRWD1     | NM_152892    | RASA4B   | NM_001277335_1 | TRRAP      | NM_003496    |
| HIP1      | NM_005338    | GTF2IRD2 | NM_173537      | NDUFA5     | NM_001291304 |
| ORAI2     | NM_032831    | KCTD7    | NM_153033      | RBM48      | NM_032120    |
| NRF1      | NM_001293163 | UBE2D4   | NM_015983      | DNAAF5     | NM_017802    |
| MTERF1    | NM_001301134 | HOXA5    | NM_019102      | SNX13      | NM_015132    |
| ZNF212    | NM_012256    | SLC12A9  | NM_001267812   | AASS       | NM_005763    |
| ZNF783    | NM_001195220 | NSUN5    | NM_001168348   | ADCK2      | NM_052853    |
| CASD1     | NM_022900    | MTRNR2L6 | NM_001190487   | KMT2C      | NM_170606    |
| USP42     | NM_032172    | PURB     | NM_033224      | BRAT1      | NM_152743    |
| MIOS      | NM_019005    | NUP205   | NM_015135      | GCC1       | NM_024523    |
| NOD1      | NM_006092    | CDCA7L   | NM_001127370   | ZNF777     | NM_015694    |
| GATSL2    | NM_001145064 | ZC3HC1   | NM_001282190   | CLDN12     | NM_001185073 |
| RASA4     | NM_006989    | AP5Z1    | NM_014855      | THAP5      | NM_001287599 |
| RBAK      | NM_001204456 | AUTS2    | NM_001127231   | KLHDC10    | NM_014997    |
| AVL9      | NM_015060    | AKAP9    | NM_005751      | PNPLA8     | NM_001256007 |
| ING3      | NM_198267    | FO XK1   | NM_001037165   | NUPL2      | NM_007342    |
| TECPR1    | NM_015395    | PPP1R35  | NM_145030      | NAPEPLD    | NM_001122838 |
| PAXIP1    | NM_007349    | EPHB4    | NM_004444      | TRIM56     | NM_030961    |
| ARHGEF5   | NM_005435    | CYCS     | NM_018947      | POMZP3     | NM_152992    |
| C7orf43   | NM_001303470 | SMURF1   | NM_181349      | WDR60      | NM_018051    |
| ZNF862    | NM_001099220 | RFC2     | NM_001278793   | MAFK       | NM_002360    |
| FBXL18    | NM_024963    | DTX2     | NM_001102596   | ATP5J2-PTC | NM_001039178 |
| SNX8      | NM_013321    | ZNF746   | NM_001163474   | RBM33      | NM_053043    |
| PEX1      | NM_001282678 | AHCYL2   | NM_001130723   | TNS3       | NM_022748    |
| ZKSCAN5   | NM_014569    | ZNF394   | NM_032164      | CDK6       | NM_001145306 |
| VPS50     | NM_017667    | ZNF12    | NM_006956      | FAM220A    | NM_001037163 |
| NOM1      | NM_138400    | LRCH4    | NM_001289934   | BCAP29     | NM_018844    |
| TYW1      | NM_018264    | GNAI1    | NM_001256414   | CDK13      | NM_031267    |
| STEAP1B   | NM_207342    | TMEM209  | NM_001301163   | NT5C3A     | NM_001002009 |
| SLC35B4   | NM_032826    | C7orf26  | NM_024067      | GPER1      | NM_001098201 |
| AP4M1     | NM_004722    | STEAP2   | NM_001040665   | STYXL1     | NM_016086    |
| CROT      | NM_001143935 | DNAJC30  | NM_032317      | PRKRIP1    | NM_024653    |
| POLM      | NM_001284331 | HOXA7    | NM_006896      | CPSF4      | NM_006693    |
| GTF2IRD2B | NM_001003795 | UMAD1    | NM_001302349   | ORC5       | NM_002553    |
| HILPDA    | NM_013332    | MKLN1    | NM_001145354   | KBTBD2     | NM_015483    |
| IQCE      | NM_001287502 | CCDC71L  | NM_175884      | PSMG3      | NM_032302    |

**Table S3-2. List of 372 genes on chromosome 7.**

|          |              |          |              |          |              |
|----------|--------------|----------|--------------|----------|--------------|
| TMEM60   | NM_032936    | TBL2     | NM_012453    | COG5     | NM_001161520 |
| REPIN1   | NM_014374    | CPED1    | NM_024913    | POM121   | NM_001257190 |
| TBRG4    | NM_001261834 | INSIG1   | NM_198336    | ZKSCAN1  | NM_001287055 |
| POLR2J2  | NM_032959    | RNF216   | NM_207111    | GTF2IRD1 | NM_005685    |
| ZNF282   | NM_001303481 | NAMPT    | NM_005746    | TTYH3    | NM_025250    |
| NACAD    | NM_001146334 | TMEM243  | NM_024315    | POP7     | NM_005837    |
| CDK5     | NM_001164410 | DLD      | NM_001289750 | WBSCR16  | NM_030798    |
| PHF14    | NM_014660    | IMPDH1   | NM_001142576 | POR      | NM_000941    |
| C7orf25  | NM_001099858 | COPG2    | NM_001290033 | DAGLB    | NM_001142936 |
| CASP2    | NM_001224    | MET      | NM_001127500 | WASL     | NM_003941    |
| PSPH     | NM_004577    | STARD3NL | NM_032016    | ANKIB1   | NM_019004    |
| ZNF3     | NM_017715    | RP9      | NM_203288    | VPS41    | NM_080631    |
| IFT22    | NM_022777    | CRCP     | NM_001040648 | ST7      | NM_021908    |
| KLHL7    | NM_018846    | LIMK1    | NM_002314    | SLC4A2   | NM_003040    |
| BLVRA    | NM_000712    | DPY19L1  | NM_015283    | CCDC136  | NM_001201372 |
| MAD1L1   | NM_001304525 | TMEM120A | NM_031925    | TMUB1    | NM_001136044 |
| DNAJC2   | NM_014377    | ARMC10   | NM_001161009 | BZW2     | NM_001159767 |
| ASL      | NM_000048    | C7orf49  | NM_001243752 | KMT2E    | NM_018682    |
| TMEM140  | NM_018295    | INTS1    | NM_001080453 | GUSB     | NM_001293105 |
| STEAP1   | NM_012449    | CNOT4    | NM_001190847 | FZD1     | NM_003505    |
| CDK14    | NM_012395    | POM121C  | NM_001099415 | CHST12   | NM_001243794 |
| HOXA9    | NM_152739    | TRIM4    | NM_033091    | GBAS     | NM_001202469 |
| GIGYF1   | NM_022574    | ANKMY2   | NM_020319    | CLIP2    | NM_032421    |
| GLI3     | NM_000168    | SAMD9L   | NM_152703    | ZMIZ2    | NM_174929    |
| METTL2B  | NM_018396    | MRPS17   | NM_015969    | MEOX2    | NM_005924    |
| LMBR1    | NM_022458    | PRKAG2   | NM_001040633 | RALA     | NM_005402    |
| MCM7     | NM_001278595 | POLR2J3  | NM_001097615 | ZDHHC4   | NM_001134389 |
| GRB10    | NM_001001550 | AIMP2    | NM_006303    | NUDCD3   | NM_015332    |
| MPLKIP   | NM_138701    | IFRD1    | NM_001550    | ZC3HAV1  | NM_024625    |
| VKORC1L1 | NM_001284342 | TMEM106B | NM_001134232 | HOXA10   | NM_018951    |
| MDFIC    | NM_199072    | SAMD9    | NM_017654    | MTURN    | NM_152793    |
| YAE1D1   | NM_001282446 | FTSJ2    | NM_013393    | SLC37A3  | NM_207113    |
| DNAJB9   | NM_012328    | PMPCB    | NM_004279    | MOSPD3   | NM_001040097 |
| HIPK2    | NM_001113239 | URGCP    | NM_001290075 | AGAP3    | NM_001281300 |
| KRIT1    | NM_194456    | HERPUD2  | NM_022373    | CNPY4    | NM_152755    |
| MICALL2  | NM_182924    | TWIST1   | NM_000474    | CUL1     | NM_003592    |
| GET4     | NM_015949    | SRPK2    | NM_182691    | NUDT1    | NM_002452    |
| DDX56    | NM_019082    | JAZF1    | NM_175061    | DFNA5    | NM_001127454 |
| PHTF2    | NM_001127360 | FAM126A  | NM_032581    | GNA12    | NM_001282440 |

**Table S3-3. List of 372 genes on chromosome 7.**

|         |              |         |              |         |              |
|---------|--------------|---------|--------------|---------|--------------|
| SMARCD3 | NM_001003802 | CYTH3   | NM_004227    | NDUFB2  | NM_004546    |
| ZNF655  | NM_138494    | YKT6    | NM_006555    | LAMTOR4 | NM_001008395 |
| RHBDD2  | NM_001040456 | PON2    | NM_001018161 | AKR1B1  | NM_001628    |
| TNRC18  | NM_001080495 | EPDR1   | NM_001242946 | SCRN1   | NM_001145514 |
| ABCF2   | NM_005692    | CCZ1    | NM_015622    | CAPZA2  | NM_006136    |
| UBE3C   | NM_014671    | EIF2AK1 | NM_001134335 | RHEB    | NM_005614    |
| PSMA2   | NM_002787    | CCZ1B   | NM_198097    | MEST    | NM_177525    |
| VOPP1   | NM_030796    | FAM180A | NM_205855    | DNAJB6  | NM_005494    |
| GNG11   | NM_004126    | OGDH    | NM_001165036 | SRI     | NM_003130    |
| WIPI2   | NM_001033520 | PLOD3   | NM_001084    | ESYT2   | NM_020728    |
| MEPCE   | NM_001194992 | FAM20C  | NM_020223_2  | SUMF2   | NM_001042470 |
| C7orf73 | NM_001130929 | LUC7L2  | NM_016019    | SEPTIN7 | NM_001788    |
| TCAF1   | NM_001206941 | CHCHD3  | NM_017812    | COPS6   | NM_006833    |
| ZFAND2A | NM_182491    | MRPL32  | NM_031903    | SSBP1   | NM_001256510 |
| HBP1    | NM_001244262 | CBX3    | NM_007276    | CUX1    | NM_001202546 |
| CYP51A1 | NM_000786    | PSMC2   | NM_002803    | SEC61G  | NM_001012456 |
| STK17A  | NM_004760    | ZNHIT1  | NM_006349    | LUZP6   | NM_001128619 |
| CREB3L2 | NM_194071    | EXOC4   | NM_001037126 | TES     | NM_015641    |
| GALNT11 | NM_001304514 | TRA2A   | NM_013293    | YWHAG   | NM_012479    |
| MALSU1  | NM_138446    | SFRP4   | NM_003014    | TMEM248 | NM_017994    |
| SRRT    | NM_001128853 | CCT6A   | NM_001762    | PDIA4   | NM_004911    |
| FASTK   | NM_006712    | FSCN1   | NM_003088    | TAX1BP1 | NM_001206901 |
| CHPF2   | NM_001284295 | HIBADH  | NM_152740    | GNB2    | NM_005273    |
| BPGM    | NM_001293085 | UBE2H   | NM_182697    | TOMM7   | NM_019059    |
| C1GALT1 | NM_020156    | PODXL   | NM_005397    | FAM3C   | NM_014888    |
| POLR2J  | NM_006234    | SUN1    | NM_001171946 | SGCE    | NM_001099401 |
| BAZ1B   | NM_032408    | PDAP1   | NM_014891    | BRI3    | NM_001159491 |
| CREB5   | NM_004904    | C7orf50 | NM_032350    | CHCHD2  | NM_016139    |
| EGFR    | NM_005228    | TRIP6   | NM_003302    | ARF5    | NM_001662    |
| CAV2    | NM_001206748 | POLD2   | NM_006230    | ARPC1A  | NM_001190996 |
| TPST1   | NM_003596    | H2AFV   | NM_138635    | SND1    | NM_014390    |
| ASNS    | NM_001673    | AHR     | NM_001621    | MRPS24  | NM_032014    |
| NUB1    | NM_016118    | LAMB1   | NM_002291    | GSTK1   | NM_001143679 |
| MRPS33  | NM_016071    | BUD31   | NM_003910    | ATP6V1F | NM_004231    |
| PTPN12  | NM_001131008 | PDE1C   | NM_001191058 | EIF4H   | NM_031992    |
| SYPL1   | NM_182715    | TMED4   | NM_001303059 | FIS1    | NM_016068    |
| RABGEF1 | NM_001287060 | AP1S1   | NM_001283    | KDEL2   | NM_001100603 |
| NDUFA4  | NM_002489    | EIF3B   | NM_001037283 | AEBP1   | NM_001129    |
| GTF2I   | NM_032999    | DBNL    | NM_001284315 | SHFM1   | NM_006304    |

**Table S3-4. List of 372 genes on chromosome 7.**

|           |              |
|-----------|--------------|
| HNRNPA2B1 | NM_002137    |
| GPNUMB    | NM_001005340 |
| GARS      | NM_002047    |
| RAC1      | NM_018890    |
| FLNC      | NM_001458    |
| ELN       | NM_001081754 |
| ARPC1B    | NM_005720    |
| SBDS      | NM_016038    |
| FKBP9     | NM_001284343 |
| ATP5J2    | NM_001039178 |
| PPIA      | NM_001300981 |
| ZYX       | NM_001010972 |
| CAV1      | NM_001753    |
| SERPINE1  | NM_000602    |
| CALD1     | NM_033140    |
| HSPB1     | NM_001540    |
| PCOLCE    | NM_002593    |
| SEMA3C    | NM_006379    |
| COL1A2    | NM_000089    |
| ACTB      | NM_001101    |
| IGFBP3    | NM_000598    |
